# Supplementary material
Source: MDPI journal article supplement (https://www.mdpi.com/2076-3417/10/7/2486)
Supplement: s1 [file s1]

# Supplementary Material

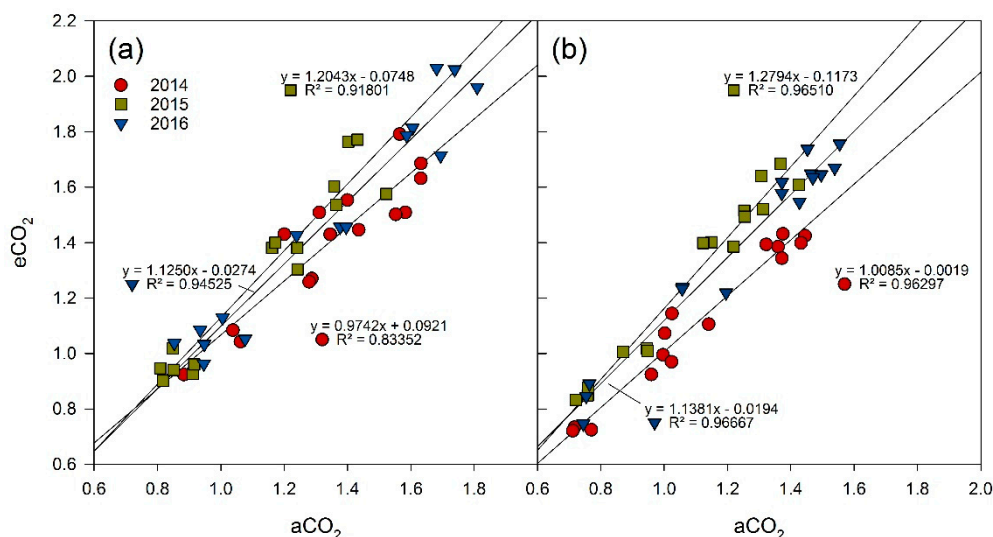

**Figure 1.** Relationship between  $aCO_2$  and  $eCO_2$  values of single-berry weight (g) for Riesling (a) and Cabernet Sauvignon (b) of the three single datasets of the three different seasons (2014, 2015, and 2016).

**Table 1.** Posterior predicted probabilities for differences in berry size categories between  $eCO_2$  and  $aCO_2$  being different from zero ( $P(\text{difference} < 0)$  and  $P(\text{difference} > 0)$ ) for each year and both cultivars, Cabernet Sauvignon (CS) and Riesling (R), from Bayesian mixed-effects adjacent category models.

| Cultivar | Year | $P(\text{Difference} < 0)$ | $P(\text{Difference} > 0)$ |
|----------|------|----------------------------|----------------------------|
| R        | 2014 | 0.20                       | 0.42                       |
|          | 2015 | 0.27                       | 0.32                       |
|          | 2016 | 0.36                       | 0.39                       |
| CS       | 2015 | 0.33                       | 0.40                       |
|          | 2016 | 0.34                       | 0.41                       |
